# Supplementary material for: Endogenous antisense RNA curbs CD39 expression in Crohn’s disease
Source: PubMed Central journal article supplement (PMC7676266; doi:10.1038/s41467-020-19692-y), 2020-11-18
Supplement: 41467_2020_19692_MOESM1_ESM.pdf [file 41467_2020_19692_MOESM1_ESM.pdf]

**Endogenous antisense RNA curbs CD39 expression in Crohn's disease**

Harshe RP, Longhi MS *et al.*

## Supplementary Notes

ENST00000452728.5 ENTPD1-AS1-209 (cDNA, 858 nucleotides) PCR product size: 135bp (variant 1, v1)

CTGTCATGGCTGCTGTCAGTGAGGGCCCGTAATGGAGATCGAGTCAAGGGTTGCCAGGGACACTTAAGAGCCTTCGGCTTCAAGG  
AGGCCTCTCAAAGGACAAAGGATGAGACTGCCTGGCGGCAGAGTGCCCCCACAAATCGTAGGAACGTGTGTCGCCCGCTTCCCGTT  
AAC TTGCCGCTAAGT TTTCTAGAAAAGTCGCCCTTCTTGCCAGGGGTGTCCTATAGACTTTGTCATGGAGTGAACAGAAAACAAA  
TACTTCATATACCCCTCATGATGTCATGAGATGACTGTTTGGATTAATCATCTTCAGACCAAGACTCTTCAGCTGGCTTGGCTTTT  
TCAGAGGAAACAGAGACTCTCAGACATGAATACTGTGACACTGACCACCAGGCCAACTTAACATCAGCAGATATCCTGTCTCAGAT  
GAAGAGAATGGCCTGCCAGAAGACAGCCAAATACATCCTTCAAACAGACTTCACTGCAGGAGACAGAGTGGATTTCATCCTGTATT  
CTCCATGTAGACTTCCATCTTCATGAGTACTCCAAGAAGATGGTTCAGTTGACTATTGCAAAGTCTCAGGTATGCTTTATCAGCA  
GCATGAAAATGGACTAATAGTACCAGTAGAGTGGGGCATTGCTGAAAAGATACCCGAAAATGTGGAAGCAACTTTGGAACCTGGGTG  
TTGAAAATAATCTGGAGGGCTCAGAAGAAGATAGGAAAATGTAGGAAAGTTTGGAACTCCTAGAGACTGTGAATGGCATTGACAAA  
AATACTGATAGTATGAAACAATAAGGTCCAGGCTGAGGTGGTCTCAGATGGAGATGAAGACCTTGTGGAACTGAAGTAA

ENST00000414006.2 ENTPD1-AS1-201(cDNA 2.457Kb) PCR product size: 257bp (variant 2, v2)

GGTGCGCCAAGTCTGTTCGCCGCGGGGTCTATCACCCCGCCCCCTGCCTCTGCCCGTGAGCGTGTGAGTTGTAGCGTACCCTGG  
GGTCTGTTCTGGAGGAGCCCTGAGAGCGGGGTGCTTGGGGCGTGGGTCTCTCATCCCTCTCGTCTGGTGAAGAAGAAGAGTATA  
CCCAGCGGCTGGCTTGGCTTTTTTCAGAGGAAACAGAGACTCTCAGACATGAATACTGTGACACTGACCACCAGGCCAACTTAACA  
CAGCAGATATCCTGTCTCAGATGAAGAGATGGAGTCTCGCACTGTCGCCCCAGTTGGAGTGTAAATGGTGCATTCGGCTCAGCT  
AAGCTCCGCTCCCGGGTTCATGCCATTCTCCTGCCCTCAGCCTCTGAGTAGCTGGAACCTACAGAATGGCCTGTCCAGAAAGCAGC  
CAATACATCTTCAAACAGACTTCACTGCAGGAGACAGAGTGGATTCACTCCTGTATTCTCCATGTAGACTTCCATCTTCATGAGT  
ACTCCAAGAAGATGGTTCAGTTGACTATTGCAAAGTCTCAGGTATGTCTTTATCAGCAGCATGAAAATGGACTAATAGTACCAGTA  
GAGTGGGGCATTGCTGAAAAGATACCCGAAAATGTGGAAGCAACTTTGGAACCTGGGTGTTGAAATAATCTGGAGGGCTCAGAAGAA  
GATAGAAAATGTAGGAAAGTTTGGAACTCCTAGAGACTGTGAATGGCATTGACAAAAATACCTGATAGTATGATGAAACAATAAGG  
TCCAGGCTGAGGTGGTCTCAGATGGAGATGAAGACCTTGTGGGAACTGAAGTAAAGGTGACCCTTGTATGTTTTAGCAAGGAGA  
CTGGCAGCATTTCACCTTGCCCTAGAGATTTGTGGAACCTTAGAGCTTGAGAGAGATGACTTAGGGTATCTGGTGAATAAATTTTC  
TAAGCAGCAAAGCATTCAAAAGGTGACTTGGGTGCTGTAAAAACATTTCTGTTTTAAAAGGGAAACAAGAGCATAAATGTGGAAAA  
TCTGCAGCCTGATGATGCAGTAGAAAAGAAAACCCATTTTTTTTTAAGGAGAAATCAAGCTGGCTGCAGAAATTTGCATAAGCAG  
CAAGGAGCCTAATGTTAATCCCCAAGACCATGGGAAAATGTCTCAGGTCATGTAGAGACCTTCATGGCAGCCCTCCCATCAC  
AGGCCAGAGGCCAGGAGGAAAAGTGGTTTTGTGGGCTGGGCCAGGGTCTCTGTGCTGTGTGCAGCCTAGGGACTTGGTGGCC  
TGTGTCCAGCTGCTCCAGCCATGGCTGAAAGGAGCCAACATAGAGCTTGGGCTGTGGCTCAGAGGGTAGAGGCCCAAGCATTG  
GCAGTTCCATGTGATGTTGAGCCTGTGGGTGCAGAGATGTCAAGAATTGAGATTTGGGAACCTTGCTAGATTTCAAGAATATAT  
ATGGAAAACCTGGATGTCCAGGCAAAAGTTTGTGTCAGGGGCAGAGCCCTCATGGGAACTCTCCTAGGGCAGTGTGGAAGGGA  
AATGTGGGGCAGAGCCCCACACAGAGTCCCTGTTGGGGCACTGCCTAGTGGAGCTGTGAGAAGAAGGCCACAGTCCCAGAACGGT  
AGACCCAGAAATGTTAGACCCAGAAATGGTAGATCAACCACCAACTTGCATCTTGTGCCTGGAAAAGCTACAGACACTCAACATCA  
GCCTGAGAAAAGCAGCCAGGAGGGAGGCTGTACTCTGCAAAGCCACAGGGGCGGAGCTGCACAAGACCATGGGAACCTATCTCTTGC  
ATCAGCATGACCTGAATGTGAGACATGGAGTCAAAGGAGATCATTATGGAGCTTTAAAATTTGACTGCCCCACTGGATTTACAGACT  
TGCATGGACCCTGTAACCCCTTTGTTTTGGCCAAATTTCTCTCATTTGGAACAGCTGTATTTACCCAATACCTGTACCCCTTATGTT  
ATCTAGGAGGTAAC TAGCTTGTCTTTACAGGCTTGTAAAGTGAAGGGACTTGCCTTGTCTCAGATGAGACTTTGGACTGTGGACTT  
TTGGTAAATGCTGAAATGAGTTAAGACTTTGGGAACTGTTGGGAAGGAATGATTGGTTTTGAAATGTGAGGATTTGAAATTTG  
GAGGAGCCAGGGAGGAATGATATGGTTTGGCTGTGTCCCAACCAATCTCAACTTGAATTTGATCTCCAGAAATCCCACATGT  
TGTGGGAGGGACGCAGTGGGAGGTAATGAATCATGGAGGCCAGTCTTTTCTGTGCTATTCTCGTGATAATAAGTCCCACAAGATC  
TGGTGGGTTTTATGAAGAGTTTCTGCTTTTGTCTTCTCCTCATTCTGCTCTTGATGCCACCAGTAAAGAAGTACCTTTTGCCTCCCA  
CCTGATTTTGGAGCCTCCCAGCCATGTGGAACCTGTAAGTCCAATTA

Primer binding sites for amplification of ENTPD1-AS1 splice variants analyzed in this study

FANA antisense oligonucleotide target regions in ENTPD1-AS1 splice variants.

GRCh38.p13 (Genome Reference Consortium Human Build 38)

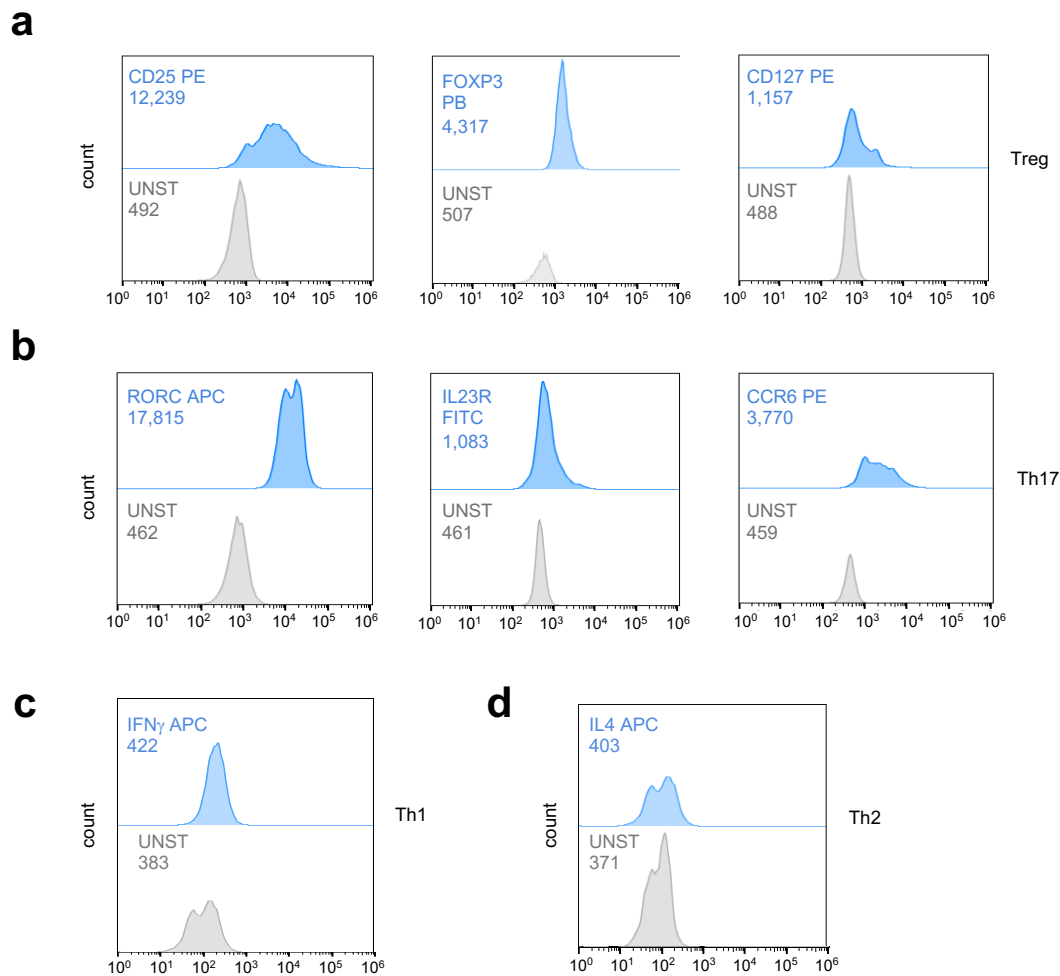

**Supplementary Fig. 1. Polarization of peripheral blood derived Treg, Th17, Th1 and Th2 cells.** Treg, Th17, Th1 and Th2 cells were polarized from circulating CD4 lymphocytes upon exposure to IL2, TGF $\beta$  and Dynabeads Human T activator CD3/CD28 (Treg); IL6, IL1 $\beta$  and TGF $\beta$  (Th17); IL12 and anti-IL4 antibodies (Th1); and to IL4 and anti-IFN $\gamma$  antibodies (Th2). **a-d** Representative histograms showing CD25, FOXP3 and CD127 MFI in Treg; RORC, IL23R and CCR6 in Th17 cells; IFN $\gamma$  in Th1 lymphocytes; and IL4 in Th2 cells from one healthy subject are shown. MFI values are indicated within the histogram plots.

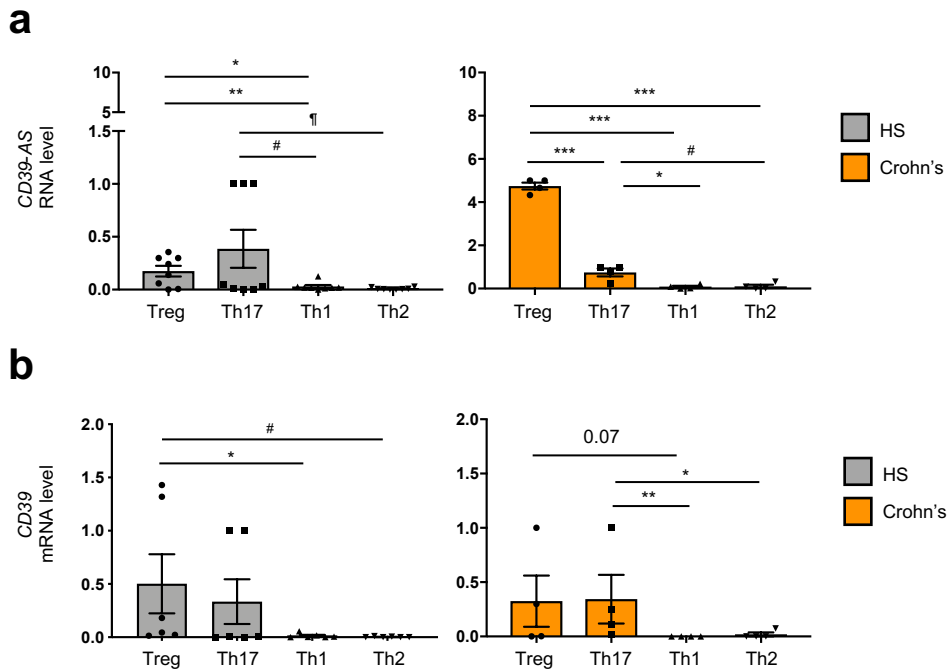

**Supplementary Fig. 2. *CD39-AS* RNA levels in T cell subsets.** Treg, Th17, Th1 and Th2 cells polarized from peripheral blood CD4 cells obtained from healthy subjects (HS) and Crohn's disease patients were tested for expression of *CD39-AS* RNA and *CD39* mRNA. **a-b** Mean  $\pm$  SEM *CD39-AS* RNA and *CD39* mRNA levels in Treg, Th17, Th1 and Th2 cell subsets (*CD39-AS* RNA: n=8 HS and n=4 Crohn's disease patients; *CD39* mRNA: n=6 HS and n=4 Crohn's disease patients). Levels of *CD39-AS* RNA and *CD39* mRNA are higher in Treg and Th17 cells than in Th1 and Th2 subsets in both health and Crohn's disease (**a** \*P=0.014, \*\*P=0.005, #P=0.046, ¶P=0.037 for HS and \*P=0.013, \*\*\*P<0.001, #P=0.018 for Crohn's patients using one-way ANOVA followed by Tukey's multiple comparisons test; **b** \*P=0.013, #P=0.014 for HS and \*P=0.032, \*\*P=0.0016 for Crohn's patients using one-way ANOVA followed by Tukey's multiple comparisons test).



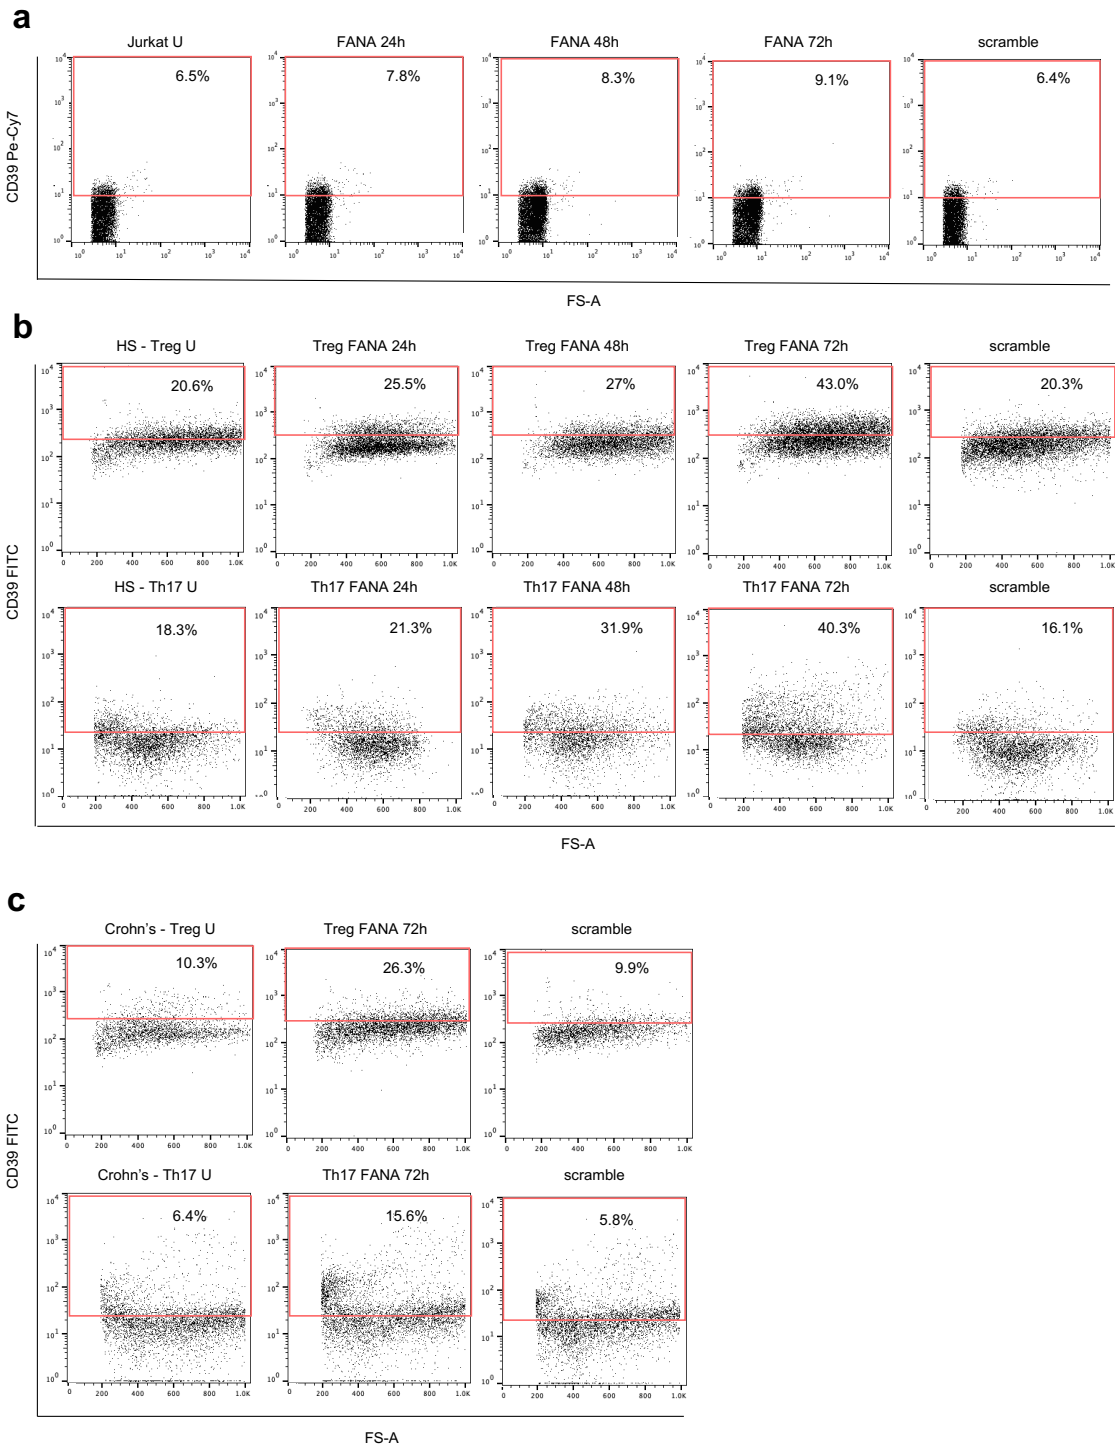

**Supplementary Fig. 3. Effects of FANA-CD39-AS oligonucleotides on CD39<sup>+</sup> cell frequency.** The frequency of CD39<sup>+</sup> cells was determined by flow cytometry in Jurkat, Treg and Th17 cells before and after treatment with FANA-CD39-AS oligonucleotides. **a** Frequency of CD39<sup>+</sup> cells is shown in untreated and FANA-CD39-AS oligonucleotide (or scramble) treated Jurkat cells at 24, 48 and 72 hours. Dot plots of forward scatter (FS-A) and CD39 fluorescence

are shown. **b** Dot plots of FS-A and CD39 fluorescence in untreated and FANA-CD39-AS oligonucleotide (or scramble) treated Treg and Th17 cells at 24, 48, 72 hours in one representative healthy subject (HS). **c** Dot plots of FS-A and CD39 fluorescence in untreated and FANA-CD39-AS oligonucleotide (or scramble) treated Treg and Th17 cells at 72 hours in one patient with Crohn's disease.

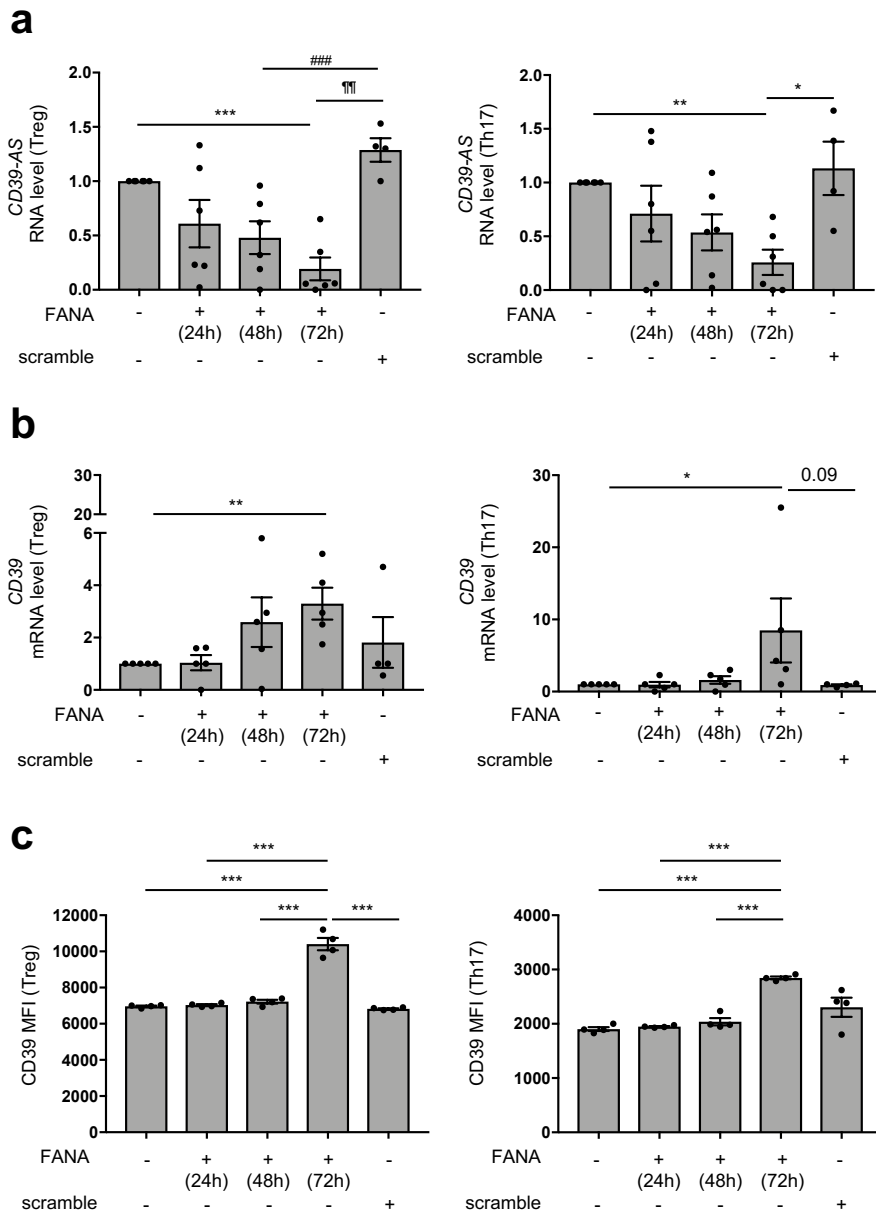

**Supplementary Fig. 4. *CD39-AS* RNA silencing boosts *CD39* mRNA and MFI in Treg and Th17 cells. a-c** Mean  $\pm$  SEM *CD39-AS* RNA, *CD39* mRNA and CD39 MFI in Treg and Th17 cells before and after exposure to *CD39-AS* RNA silencing with FANA-*CD39-AS* oligonucleotides (or scramble) for 24, 48 and 72 hours (*CD39-AS* RNA: n=6 HS for untreated, FANA 24 hours, 48 hours and 72 hours; n=4 for scramble; *CD39* mRNA: n=5 HS for untreated, FANA 24 hours, 48 hours and 72 hours; n=4 for scramble; CD39 MFI: n=4 HS for all conditions) (**a** \*\*\*P=0.00056, ###P=0.00013, ¶P=0.0046 for Treg and \*P=0.03, \*\*P=0.0014, for Th17; **b** \*\*P=0.005, \*P=0.017; **c** \*\*\*P<0.001 using one-way ANOVA followed by Tukey's multiple comparisons test).

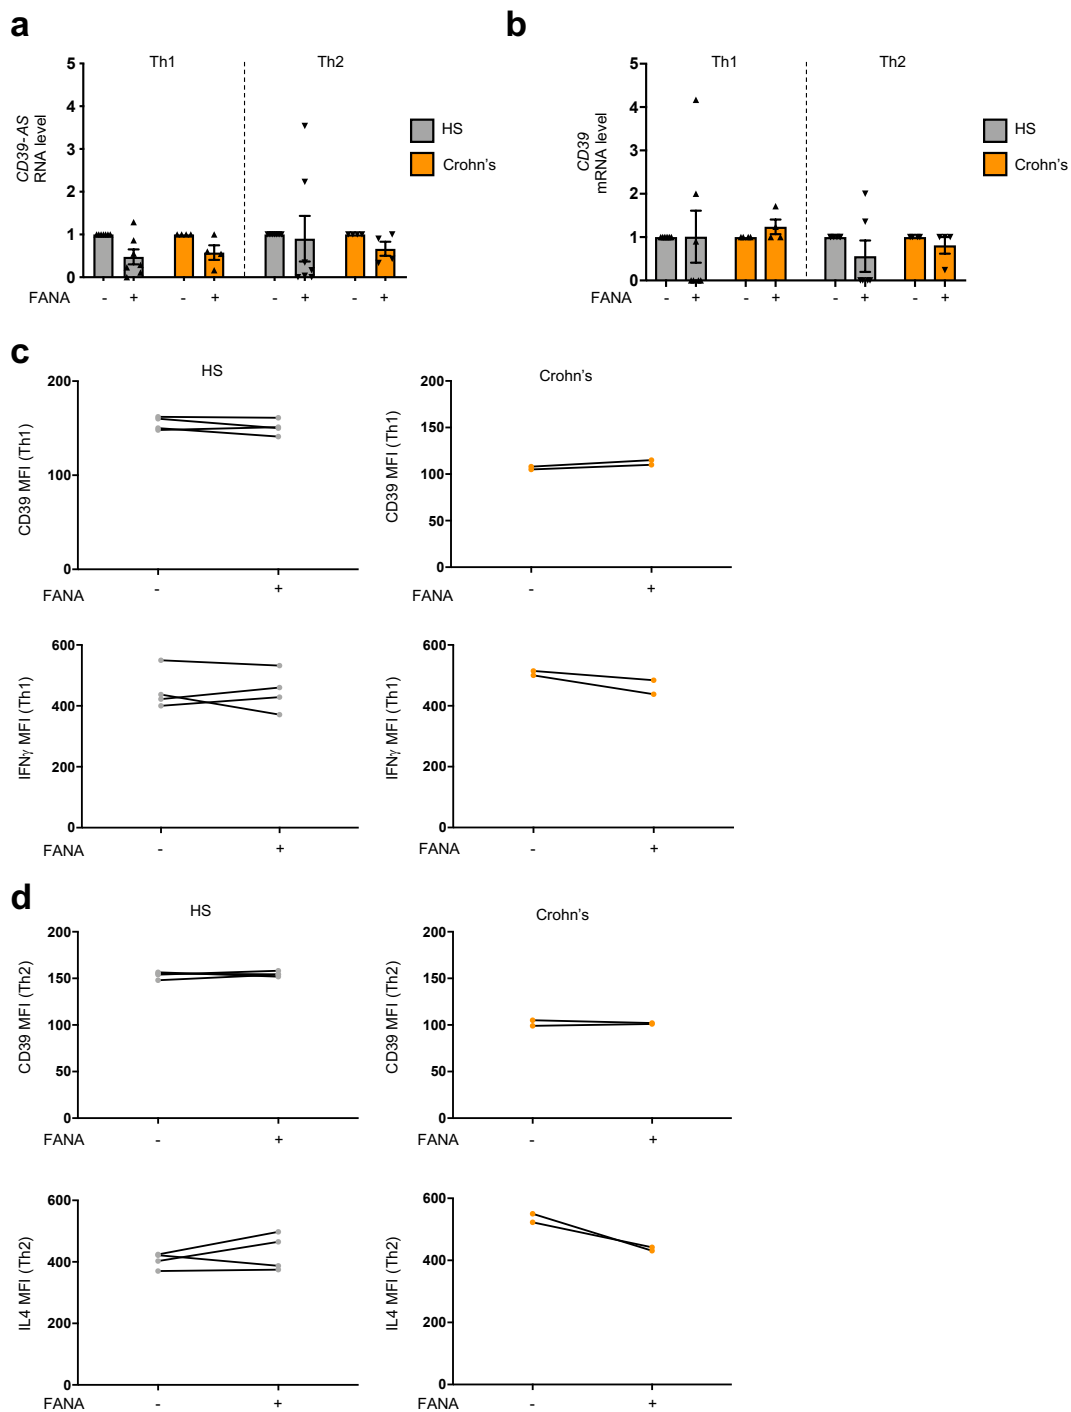

**Supplementary Fig. 5. Effects of *CD39-AS* RNA silencing on Th1 and Th2 cells.** Levels of *CD39-AS* RNA and *CD39* mRNA were measured in Th1 and Th2 cells, obtained upon polarization of CD4 cells from healthy subjects (HS) and patients with Crohn's disease. **a-b** Mean  $\pm$  SEM *CD39-AS* RNA and *CD39* mRNA in Th1 and Th2 cells before and after exposure to FANA-*CD39-AS* oligonucleotides for 72 hours (*CD39-AS* RNA: n=7 HS and n=4 Crohn's disease patients; *CD39* mRNA: n=7 HS for Th1, n=6 HS for Th2 and n=4 Crohn's disease

patients for both cell types). **c-d** Effects of *CD39-AS* RNA silencing on CD39, IFN $\gamma$  (Th1) and IL4 (Th2) were also assessed in 4 HS and in 2 Crohn's disease patients. No significant changes in any of these parameters were noted before and after cell exposure to FANA-CD39-AS oligonucleotides.

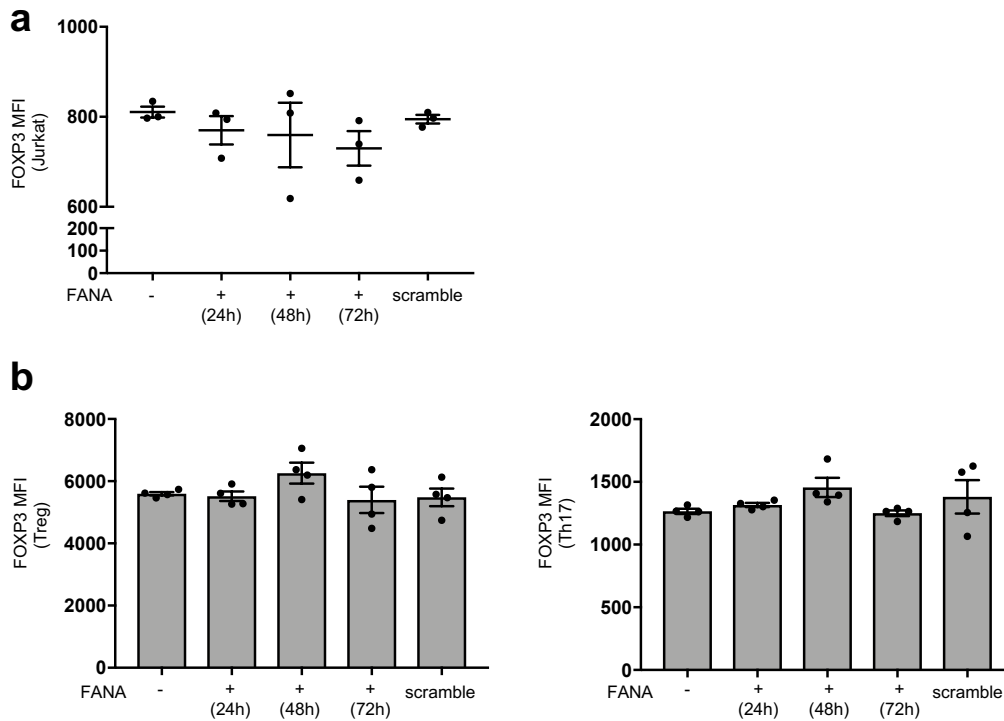

**Supplementary Fig. 6. *CD39-AS* RNA silencing does not impact FOXP3 levels in Treg and Th17 cells.** Expression of FOXP3 in Jurkat, Treg and Th17 cells, the latter differentiated from peripheral blood derived CD4 lymphocytes, was determined by flow cytometry and expressed as MFI. **a-b** Mean  $\pm$  SEM FOXP3 MFI in untreated and FANA-*CD39-AS* oligonucleotide treated Jurkat (n=3 replicates), Treg and Th17 cells for 24, 48 and 72 hours (n=4 HS). Silencing of *CD39-AS* RNA did not change FOXP3 MFI in all cell types.

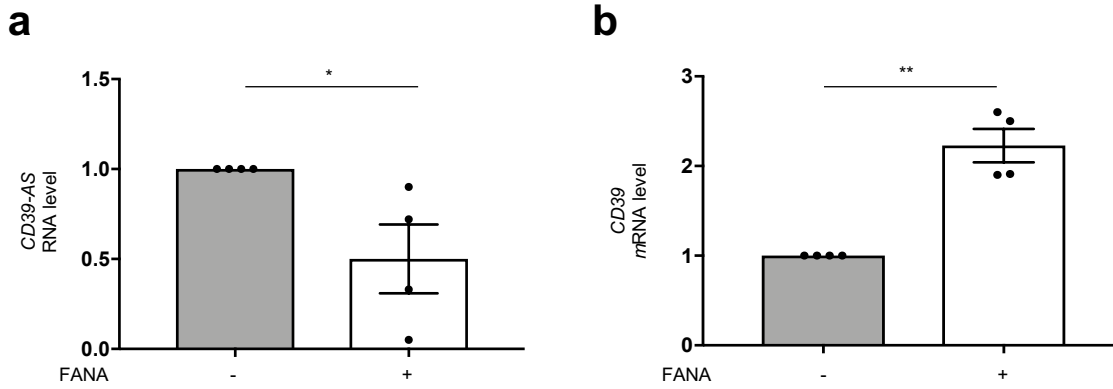

**Supplementary Fig. 7. In vitro silencing of *CD39-AS* RNA in human CD4 cells.** Human CD4 cells, obtained from one healthy blood donor were assessed for *CD39-AS* RNA and *CD39* mRNA levels before and after 72-hours treatment with FANA-*CD39-AS* oligonucleotides. **a-b** Mean  $\pm$  SEM *CD39-AS* RNA and *CD39* mRNA levels following CD4 T cell exposure to 10  $\mu$ M FANA-*CD39-AS* oligonucleotides for 72 hours (n=4 replicates) (**a** \*P=0.039; **b** \*\*P=0.007 using two-sided paired t test).

**a**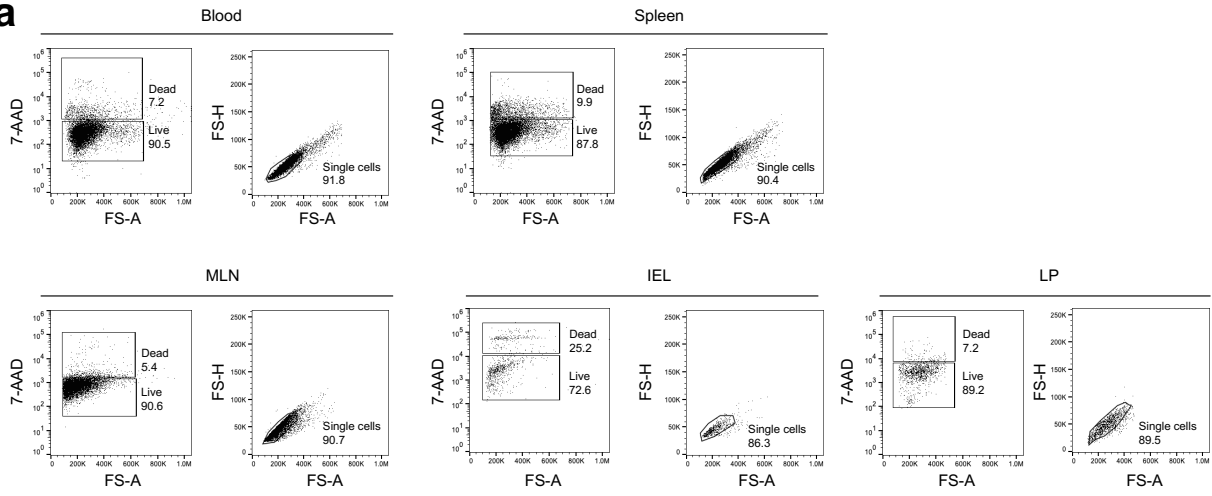**b**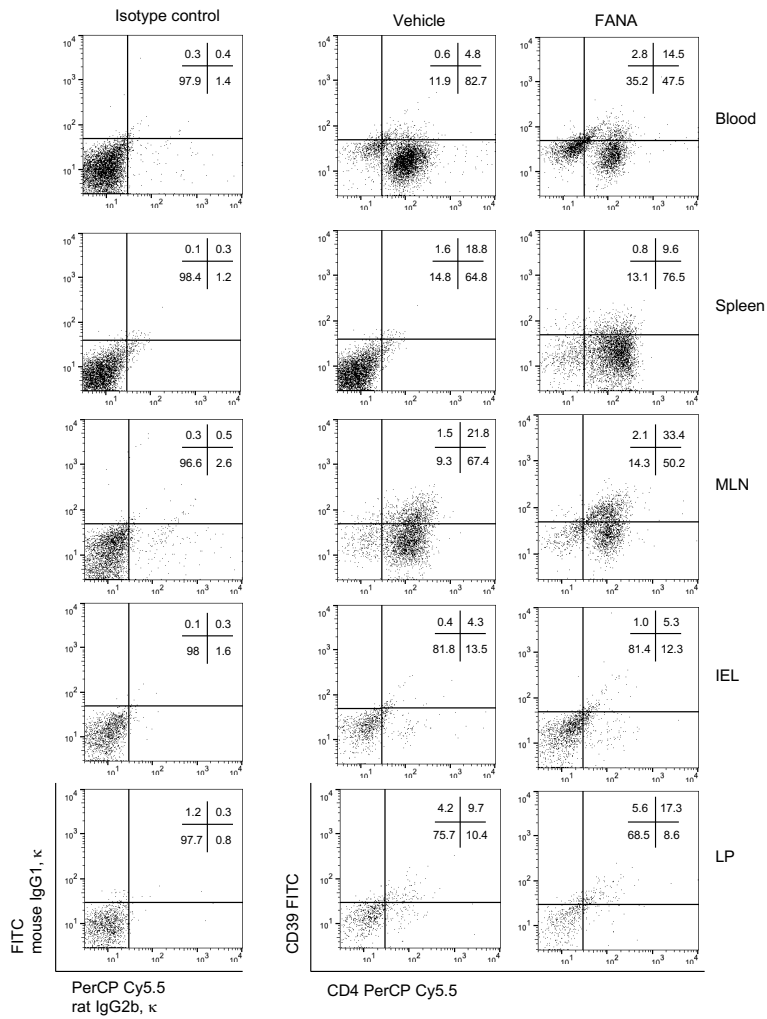



**C**

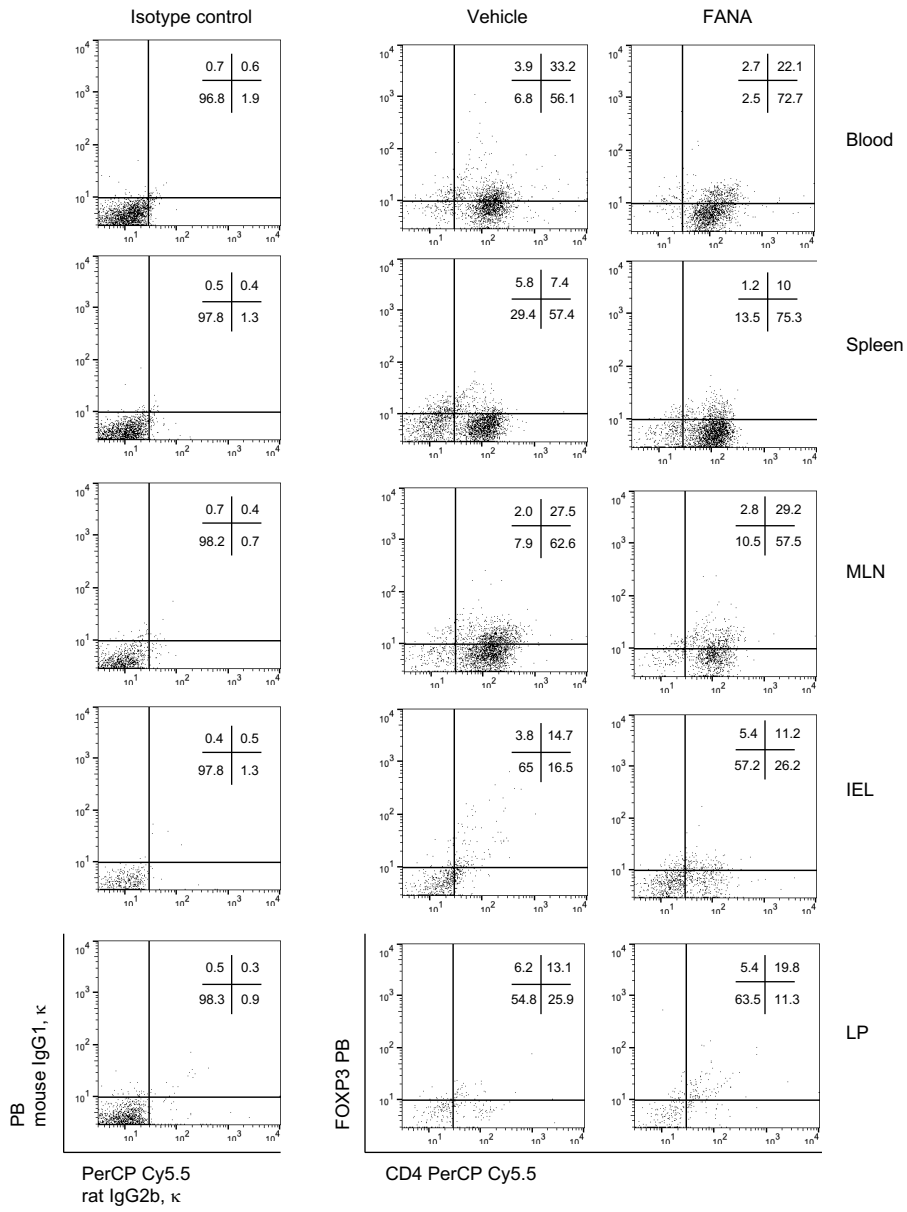

**d**

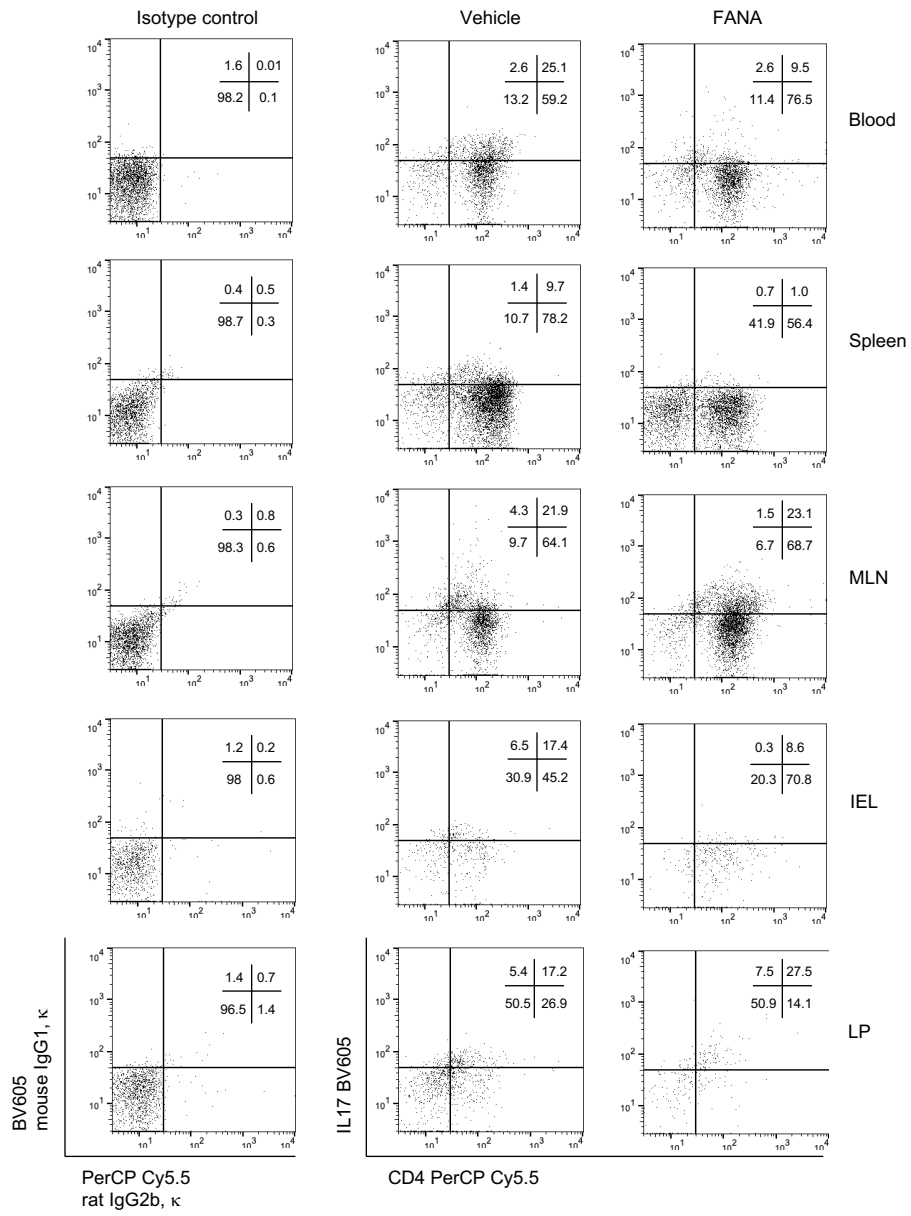

**e**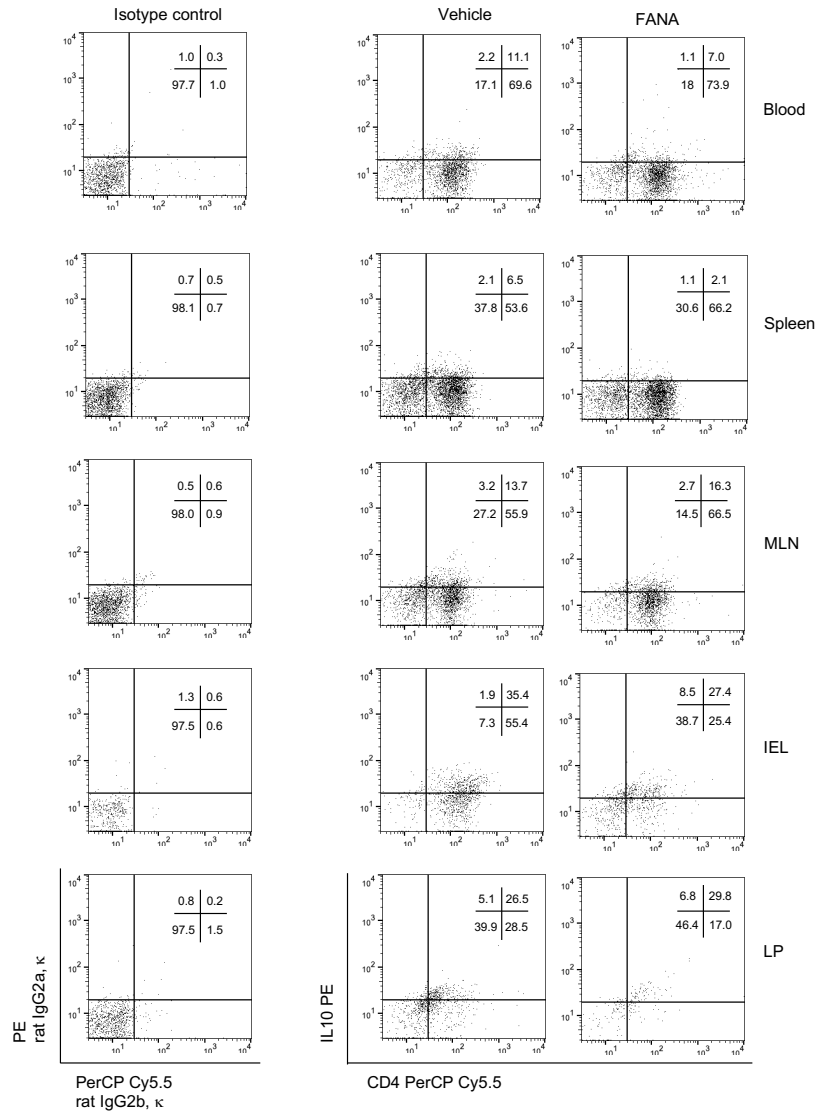**f**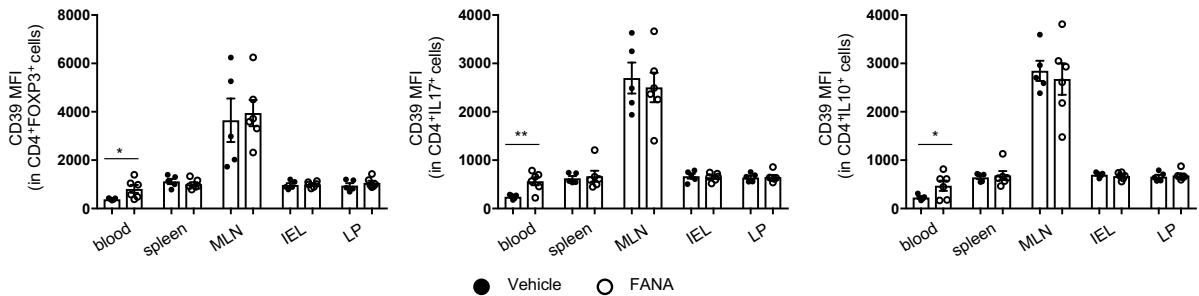

**Supplementary Fig. 8. Effect of FANA-CD39-AS treatment on CD4 cell phenotype in TNBS induced colitis in humanized NOD/scid/gamma mice.** Following reconstitution with healthy blood donor derived CD4 cells, NOD/scid/gamma mice were sensitized and administered

TNBS. At the same time of TNBS administration some animals were treated with FANA-CD39-AS oligonucleotides. Mice were harvested 72 hours later and frequency of human CD4<sup>+</sup>CD39<sup>+</sup>, CD4<sup>+</sup>FOXP3<sup>+</sup>, CD4<sup>+</sup>IL17<sup>+</sup> and CD4<sup>+</sup>IL10<sup>+</sup> cells within peripheral blood, spleen, mesenteric lymph node (MLN), intra-epithelial (IEL) and lamina propria (LP) derived lymphocytes was determined by flow cytometry. **a** Lymphocytes were initially stained with 7-AAD viability staining solution to exclude dead cells. Viable cells were then checked for the presence of doublets in the FS-A and FS-H flow cytometry plots. Single cells were gated and analysis carried on. Cell frequencies are indicated next to the gate. Representative FS-A and 7-AAD and FS-A and FS-H flow cytometry plots of peripheral blood, spleen, MLN, IEL and LP lymphocytes obtained from a representative vehicle and FANA-CD39-AS treated mice are shown. **b-e** Dot plots of isotype controls, human CD4 and CD39, FOXP3, IL17 and IL10 fluorescence in peripheral blood, spleen, MLN, IEL and LP lymphocytes in one representative vehicle and one FANA-CD39-AS treated mice are shown. Cell frequencies are shown in the upper right quadrant. **f** Mean  $\pm$  SEM CD39 MFI in CD4<sup>+</sup>FOXP3<sup>+</sup>, CD4<sup>+</sup>IL17<sup>+</sup> and CD4<sup>+</sup>IL10<sup>+</sup> cells in different compartments in vehicle and FANA-CD39-AS treated mice. FANA-CD39-AS treatment increases CD39 MFI in all these cell populations in the peripheral blood (vehicle treated mice, n=5; FANA-CD39-AS treated mice, n=6) (\*P=0.039 for CD4<sup>+</sup>FOXP3<sup>+</sup>, \*\*P=0.009 for CD4<sup>+</sup>IL17<sup>+</sup> and \*P=0.047 for CD4<sup>+</sup>IL10<sup>+</sup> using two-sided unpaired t test).

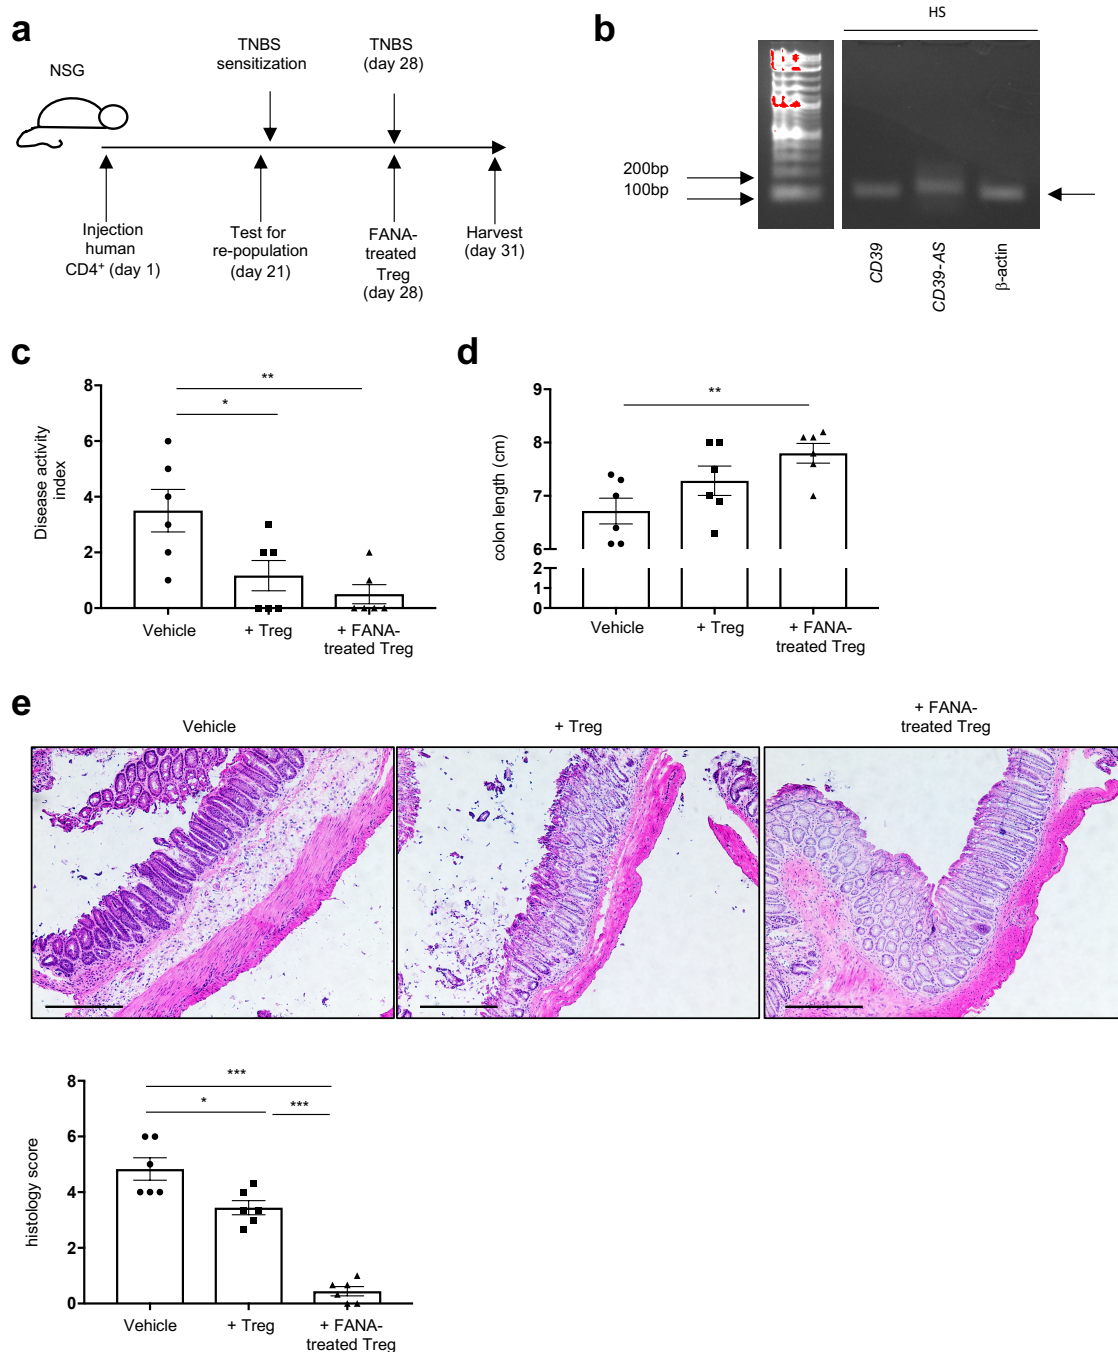

**Supplementary Fig. 9. Silencing of *CD39-AS* RNA ameliorates Treg suppressive ability in TNBS induced experimental colitis in humanized NOD/scid/gamma mice. **a**** NOD/scid/gamma female recipients were injected with CD4 cells, obtained from one healthy blood donor. After three weeks, mice were checked for human chimerism and those animals showing more than 10% human chimerism were sensitized to TNBS. One week later, mice were administered a single enema of TNBS and injected CD4<sup>+</sup>CD25<sup>high</sup>CD127<sup>low</sup> Treg, immunomagnetically sorted from the peripheral blood of the same donor and exposed to 10  $\mu$ M FANA-CD39-AS oligonucleotides. Mice were sacrificed 72 hours later. **b** Cropped gel of RT-

PCR showing positivity for CD39 and *CD39-AS* RNA in healthy blood donor Treg prior to FANA-CD39-AS treatment (representative of three independent experiments with similar results). Full scan gel is provided in Source Data file. **c** Mean  $\pm$  SEM disease activity index at the time of harvest in TNBS mice treated with vehicle (n=6), or with untreated (n=6) or FANA-CD39-AS oligonucleotide treated Treg (n=6) (\*P=0.031, \*\*P=0.0049 using one-way ANOVA followed by Tukey's multiple comparisons test). **d** Mean  $\pm$  SEM colon length (cm) at the harvest (\*\*P=0.0051 using one-way ANOVA followed by Tukey's multiple comparisons test). **e** Hematoxylin & Eosin staining of colon sections (original magnification, x10, scale bar: 200  $\mu$ M). Mean  $\pm$  SEM histology score at the time of harvesting is also shown (\*P=0.014, \*\*\*P<0.001 using one-way ANOVA followed by Tukey's multiple comparisons test).

**a**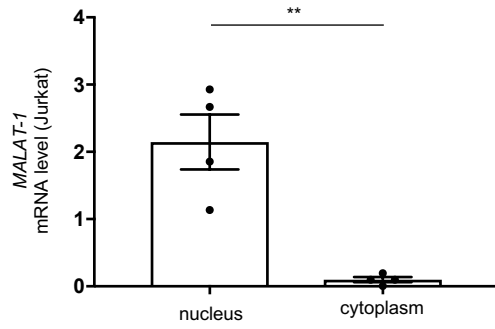**b**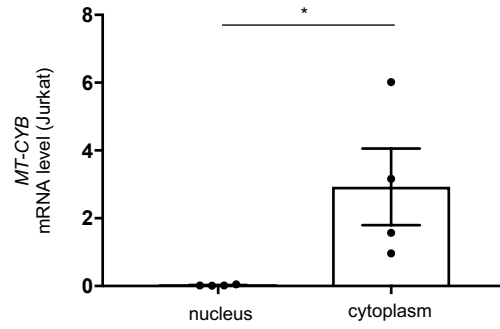

**Supplementary Fig. 10. Validation of subcellular fractioning.** Total RNA from nuclear and cytosolic subcellular fractions was obtained from Jurkat cells and validated for *MALAT1* and *MT-CYB* expression by RT-qPCR. **a-b** Mean  $\pm$  SEM *MALAT-1* and *MT-CYB* mRNA levels in the nuclear and cytosolic fraction of Jurkat cells (n=4 replicates) (**a** \*\*P=0.0024; **b** \*P=0.042 using two-sided unpaired t test).

**a**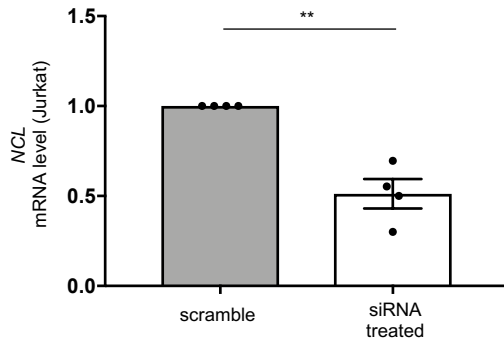**b**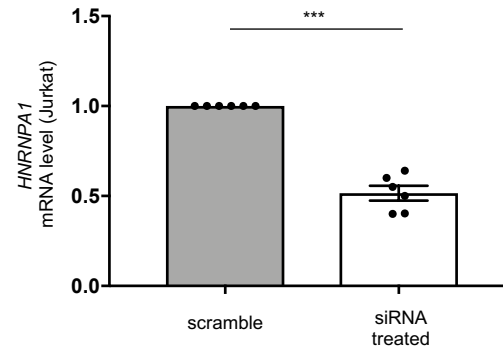

**Supplementary Fig. 11. NCL and HNRNPA1 silencing via RNAi.** Jurkat cells were treated with scramble or siRNA specific to NCL and HNRNPA1. Silencing was validated fourteen hours later via RT-qPCR analysis. **a-b** Mean  $\pm$  SEM *NCL* and *HNRNPA1* mRNA levels in the absence or presence of specific siRNA in Jurkat cells (n=4 replicates for *NCL* and n=6 replicates for *HNRNPA1*) (**a** \*\*P=0.009; **b** \*\*\*P<0.001 using two-sided unpaired t test).



**Supplementary Table 1. Primers used for qPCR and RNA pulldown assays**

|                                         | <b>Forward</b>                                             | <b>Reverse</b>                   |
|-----------------------------------------|------------------------------------------------------------|----------------------------------|
| <i>CD39/ENTPD1-AS1</i> (qPCR)           | 5' AATACTGTGACACTGACCACCAGG 3'                             | 5' TGAATCCACTCTGTCTCCTGCA 3'     |
| <i>CD39/ENTPD1</i> (qPCR)               | 5' AGGTGCCTATGGCTGGATTAC 3'                                | 5' CCAAAGCTCCAAAGGTTTCCT 3'      |
| <i>MALAT-1</i> (qPCR)                   | 5' AAGCCCAAATCTCAAGCGGT 3'                                 | 5' AAGTTGCTTGTGGGGAGACC 3'       |
| <i>MT-CYB</i> (qPCR)                    | 5' ACCCCCTAGGAATCACCTCC 3'                                 | 5' GCCTAGGAGGTCTGGTGAGA 3'       |
| <i>Nucleolin</i> (qPCR)                 | 5' GATCACCTAATGCCAGAAGCCAGCCATCC 3'                        | 5' CAAAGCCGCTCTGCCTCCACCAC 3'    |
| <i>HNRNPA1</i> (qPCR)                   | 5' AAGCAATTTTGGAGGTGGTG 3'                                 | 5' ATAGCCACCTTGGTTTCGTG 3'       |
| <i>ENST00000452728.5</i> (RNA pulldown) | 5' <u>TAATACGACTCACTATAGGG</u> CTGTCATGGCTGCTGTCTCAGTGA 3' | 5' TTTACTTCAGTCCCAACAAGGTCTTC 3' |
| <i>ENST00000414006.2</i> (RNA pulldown) | 5' <u>TAATACGACTCACTATAGGG</u> CACGCGCCTTTGGGAATCTTC 3'    | 5' TATCTTCTTCTGAGCCCTCCAGATT 3'  |

Sequence of forward and reverse primer pairs used for qPCR and RNA pulldown (template amplification) experiments are shown.

Orange underlined sequence represents the T7 promoter region.

**Supplementary Table 2. Total spectrum counts - *ENTPD1-AS1-209 (ENST00000452728.5)* variant (v1)**

| Identified Proteins                                 | Total spectrum counts | Accession Number | Alternate ID | Molecular Weight |
|-----------------------------------------------------|-----------------------|------------------|--------------|------------------|
| Nucleolin                                           | 21                    | NUCL_HUMAN       | NCL          | 77 kDa           |
| Heterogeneous nuclear ribonucleoprotein A1          | 19                    | ROA1_HUMAN       | HNRNPA1      | 39 kDa           |
| Heterogeneous nuclear ribonucleoproteins A2/B1      | 17                    | ROA2_HUMAN       | HNRNPA2B1    | 37 kDa           |
| Insulin-like growth factor 2 mRNA-binding protein 1 | 12                    | IF2B1_HUMAN      | IGF2BP1      | 63 kDa           |
| RNA-binding motif protein, X chromosome             | 9                     | RBMX_HUMAN       | RBMX         | 42 kDa           |
| Heterogeneous nuclear ribonucleoprotein A3          | 9                     | ROA3_HUMAN       | HNRNPA3      | 40 kDa           |
| Heterogeneous nuclear ribonucleoprotein M           | 8                     | HNRPM_HUMAN      | HNRNPM       | 78 kDa           |
| Ras GTPase-activating protein-binding protein 1     | 8                     | G3BP2_HUMAN      | G3BP2        | 54 kDa           |
| Heterogeneous nuclear ribonucleoprotein A0          | 8                     | ROA0_HUMAN       | HNRNPA0      | 31 kDa           |
| IFN-inducible ds RNA-dependent PK activator A       | 7                     | PRKRA_HUMAN      | PRKRA        | 34 kDa           |
| 40S ribosomal protein S19                           | 6                     | RS19_HUMAN       | RPS19        | 16 kDa           |
| Heterogeneous nuclear ribonucleoprotein L           | 6                     | HNRPL_HUMAN      | HNRNPL       | 64 kDa           |
| Insulin-like growth factor 2 mRNA-binding protein 3 | 6                     | IF2B1_HUMAN      | IGF2BP1      | 63 kDa           |
| Single-stranded DNA-binding protein, mitochondrial  | 5                     | SSBP_HUMAN       | SSBP1        | 17 kDa           |
| Nuclease-sensitive element-binding protein 1        | 4                     | YBOX1_HUMAN      | YBX1         | 36 kDa           |
| Synaptotagmin-like protein 4                        | 4                     | SYTL4_HUMAN      | SYTL4        | 76 kDa           |
| Putative 40S ribosomal protein S10-like             | 4                     | RS10L_HUMAN (+1) | RPS10P5      | 20 kDa           |
| Non-POU domain-containing octamer-binding protein   | 4                     | NONO_HUMAN       | NONO         | 54 kDa           |
| Replication protein A 32 kDa subunit                | 4                     | RFA2_HUMAN       | RPA2         | 29 kDa           |
| Caprin-1                                            | 3                     | CAPR1_HUMAN      | CAPRIN1      | 78 kDa           |
| Ras GTPase-activating protein-binding protein 2     | 3                     | G3BP2_HUMAN      | G3BP2        | 54 kDa           |
| Y-box-binding protein 3                             | 3                     | YBOX3_HUMAN      | YBX3         | 40 kDa           |
| THO complex subunit 4                               | 2                     | THOC4_HUMAN      | ALYREF       | 27 kDa           |
| Double-stranded RNA-specific adenosine deaminase    | 2                     | DSRAD_HUMAN      | ADAR         | 136 kDa          |
| 40S ribosomal protein S14                           | 2                     | RS14_HUMAN       | RPS14        | 16 kDa           |
| Elongation factor 1-alpha 1                         | 2                     | EF1A1_HUMAN (+1) | EEF1A1       | 50 kDa           |

**Supplementary Table 3. Total spectrum counts - *ENTPD1-AS1-201 (ENST00000414006.2)* variant (v2)**

| Identified Proteins                                 | Total spectrum counts | Accession Number | Alternate ID | Molecular Weight |
|-----------------------------------------------------|-----------------------|------------------|--------------|------------------|
| Nucleolin                                           | 14                    | NUCL_HUMAN       | NCL          | 77 kDa           |
| Heterogeneous nuclear ribonucleoprotein A1          | 7                     | ROA1_HUMAN       | HNRNPA1      | 39 kDa           |
| IFN-inducible ds RNA-dependent PK activator A       | 4                     | PRKRA_HUMAN      | PRKRA        | 34 kDa           |
| Heterogeneous nuclear ribonucleoprotein M           | 3                     | HNRPM_HUMAN      | HNRNPM       | 78 kDa           |
| Single-stranded DNA-binding protein, mitochondrial  | 3                     | SSBP_HUMAN       | SSBP1        | 17 kDa           |
| Synaptotagmin-like protein 4                        | 3                     | SYTL4_HUMAN      | SYTL4        | 76 kDa           |
| RNA-binding motif protein, X chromosome             | 2                     | RBMX_HUMAN       | RBMX         | 42 kDa           |
| Heterogeneous nuclear ribonucleoproteins A2/B1      | 2                     | ROA2_HUMAN       | HNRNPA2B1    | 37 kDa           |
| 40S ribosomal protein S19                           | 2                     | RS19_HUMAN       | RPS19        | 16 kDa           |
| Nuclease-sensitive element-binding protein 1        | 2                     | YBOX1_HUMAN      | YBX1         | 36 kDa           |
| Insulin-like growth factor 2 mRNA-binding protein 3 | 2                     | IF2B3_HUMAN      | IGF2BP3      | 64 kDa           |
| THO complex subunit 4                               | 2                     | THOC4_HUMAN      | ALYREF       | 27 kDa           |
| Putative 40S ribosomal protein S10-like             | 2                     | RS10L_HUMAN (+1) | RPS10P5      | 20 kDa           |
| Caprin-1                                            | 2                     | CAPR1_HUMAN      | CAPRIN1      | 78 kDa           |
| Insulin-like growth factor 2 mRNA-binding protein 1 | 1                     | IF2B3_HUMAN      | IGF2BP3      | 64 kDa           |
| Heterogeneous nuclear ribonucleoprotein A3          | 1                     | ROA3_HUMAN       | HNRNPA3      | 40 kDa           |
| Heterogeneous nuclear ribonucleoprotein L           | 1                     | HNRPL_HUMAN      | HNRNPL       | 64 kDa           |
| Heterogeneous nuclear ribonucleoprotein A0          | 1                     | ROA0_HUMAN       | HNRNPA0      | 31 kDa           |
| Non-POU domain-containing octamer-binding protein   | 1                     | NONO_HUMAN       | NONO         | 54 kDa           |
| Ras GTPase-activating protein-binding protein 1     | 0.01                  | G3BP2_HUMAN      | G3BP2        | 54 kDa           |
| Double-stranded RNA-specific adenosine deaminase    | 0.01                  | DSRAD_HUMAN      | ADAR         | 136 kDa          |
| Replication protein A 32 kDa subunit                | 0.01                  | RFA2_HUMAN       | RPA2         | 29 kDa           |
| Ras GTPase-activating protein-binding protein 2     | 0.01                  | G3BP2_HUMAN      | G3BP2        | 54 kDa           |
| Y-box-binding protein 3                             | 0.01                  | YBOX3_HUMAN      | YBX3         | 40 kDa           |
| 40S ribosomal protein S14                           | 0.01                  | RS19_HUMAN       | RPS19        | 16 kDa           |
| Elongation factor 1-alpha 1                         | 0.01                  | EF1A1_HUMAN (+1) | EEF1A1       | 50 kDa           |

**Supplementary Table 4. Demographic and clinical data.**

|                           |                                  |
|---------------------------|----------------------------------|
| Crohn's Disease<br>(n=70) |                                  |
| Active/Inactive           | 30/40                            |
| Sex (F/M)                 | 32/38                            |
| Montreal Age              | '1' n=1<br>'2' n=39<br>'3' n=30  |
| Montreal Type             | '1' n=47<br>'2' n=10<br>'3' n=13 |
| HBI<br>range (median)     | 1-12 (3)                         |
| Infliximab                | 31                               |
| Steroids                  | 16                               |
| Mercaptopurine            | 8                                |

F: female

M: male

Montreal Age: '1' < 16 years; '2' 17-40 years; '3' > 40 years

Montreal Type: '1' inflammatory; '2' stricturing; '3' penetrating

HBI: Harvey Bradshaw Index
